# Supplementary material for: Maternal 3’UTRs: from egg to onset of zygotic transcription in Atlantic cod
Source: PubMed Central journal article supplement (PMC3462720; doi:10.1186/1471-2164-13-443), 2012-09-01

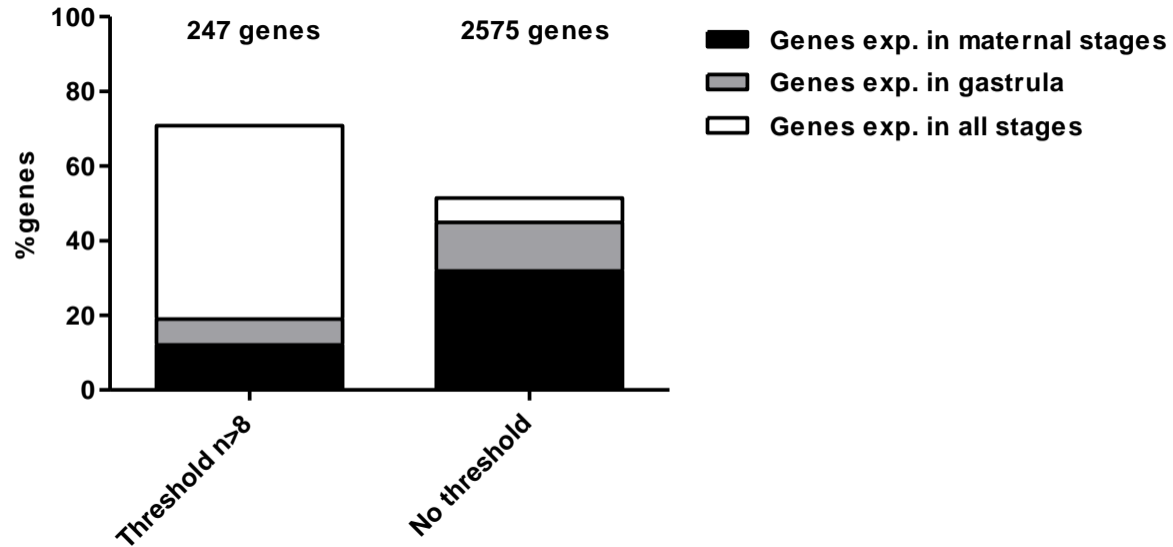

Supplement: 1471-2164-13-443-S3.pdf [file 1471-2164-13-443-S3.pdf]
